# Supplementary material for: NEXMIF overexpression is associated with autism-like behaviors and alterations in dendritic arborization and spine formation in mice
Source: Front Neurosci. 2025 Jun 18;19:1556570. doi: 10.3389/fnins.2025.1556570 (PMC12215126; doi:10.3389/fnins.2025.1556570)
Supplement: Supplementary file 7 [file Table_1.xlsx]

## Sheet: RNA Sequencing
	Raw Avg Expression (n=2)		Log 2 Expression
Gene.name	CTRL	NEX OX	CTRL	NEX OX	log2FoldChange	pvalue	padj	Fold Change		Supplementary Table 1. RNA Sequencing Dataset
Gm10093	5.63276	58.8572	2.49384	5.87915	3.38531	2.49443e-06	0.00067104	10.4491		RNA Sequencing data showing the average expression values, normalized average expression values (Log2),
Gm7887	8.41031	77.9725	3.07216	6.28489	3.21274	3.25006e-08	1.47266e-05	9.27107		normalized fold-changes (Log2), p values, and adjusted p values of 161 differentially expressed genes (DEGs)
Gm18860	4.19739	35.0501	2.06949	5.13135	3.06186	0.00033456	0.0336213	8.35046		from the hippocampus of P70 CTRL and NEXOX male mice (n=2, n=2).
Gm6089	20.8937	118.295	4.385	6.88625	2.50125	6.80322e-09	3.71753e-06	5.66175
AA465934	65.1719	263.339	6.02618	8.04077	2.0146	6.04484e-12	5.56316e-09	4.04068
Gm11223	60.2372	212.508	5.91258	7.73137	1.81879	3.40463e-06	0.000850478	3.52786
Gm47283	120.754	380.19	6.91593	8.57058	1.65465	9.36217e-09	4.81491e-06	3.14847
Serpinb8	52.9443	155.278	5.7264	7.27871	1.5523	6.29799e-05	0.00910138	2.93285
Alpk1	136.814	322.009	7.09608	8.33096	1.23488	6.83198e-05	0.00963419	2.35362
Tmem181b-ps	4471.74	10128.6	12.1266	13.3061	1.17953	8.06842e-19	2.82169e-15	2.26503
Fezf2	409.588	890.378	8.67803	9.79827	1.12024	0.00029104	0.0301131	2.17384
Cdr1	219.341	471.968	7.77703	8.88255	1.10551	4.13251e-05	0.00675337	2.15175
Crhbp	158.755	324.884	7.31066	8.34378	1.03312	0.000122073	0.0151388	2.04645
Lpl	424.665	832.741	8.73018	9.70172	0.971542	2.56137e-05	0.00447881	1.96094
Sgk1	940.002	1716.49	9.87652	10.7452	0.868728	5.84087e-05	0.00882645	1.82605
Vipr1	411.016	743.855	8.68305	9.53888	0.855827	0.00031863	0.0325822	1.8098
Ankrd33b	1115.29	1940.86	10.1232	10.9225	0.799277	2.0964e-05	0.00385869	1.74023
Klf10	286.314	493.444	8.16145	8.94674	0.785288	6.15905e-05	0.00910138	1.72344
Rasl11b	664.14	1134.79	9.37534	10.1482	0.772871	1.39948e-06	0.000407854	1.70867
Dkk3	4788.6	7863.03	12.2254	12.9409	0.715483	3.27197e-05	0.00560918	1.64203
Dio2	756.303	1223.96	9.56282	10.2573	0.694517	0.000128045	0.0156572	1.61834
Igfbp4	1072.23	1697.05	10.0664	10.7288	0.662421	3.60572e-05	0.00606246	1.58274
Nr4a1	937.303	1425.6	9.87237	10.4774	0.604981	6.22026e-05	0.00910138	1.52096
Ier5	901.84	1361.98	9.81673	10.4115	0.594767	0.000368267	0.035975	1.51023
Fam212b	1679.01	2526.12	10.7134	11.3027	0.589313	0.000250697	0.0272278	1.50453
Slc17a7	19305.2	28966.5	14.2367	14.8221	0.5854	8.52355e-06	0.0017957	1.50045
Egr1	1838.57	2669.5	10.8444	11.3824	0.537989	0.000482111	0.0453236	1.45195
Extl1	1277.77	1833.8	10.3194	10.8406	0.521208	0.00034202	0.0339805	1.43516
Ksr2	3651.83	5197.32	11.8344	12.3436	0.509148	9.57963e-05	0.0126901	1.42321
Stac2	1958.73	2729.59	10.9357	11.4145	0.478771	0.000346362	0.0342174	1.39356
Timp2	8320.73	6055.21	13.0225	12.564	-0.458534	0.000510266	0.0472091	0.727725
6330403K07Rik	6225.42	4233.94	12.604	12.0478	-0.55617	0.000100757	0.01307	0.680105
Kcnh2	1866.54	1235.78	10.8661	10.2712	-0.594944	0.000248868	0.0271981	0.66207
Grb10	2022.55	1333.91	10.982	10.3814	-0.600513	0.000125501	0.0154543	0.659519
mt-Te	1045.62	683.233	10.0301	9.41623	-0.613907	0.000506562	0.0471157	0.653425
Samd14	2212.12	1425.63	11.1112	10.4774	-0.633834	0.000101936	0.0131063	0.644461
Tox2	1187.11	759.936	10.2132	9.56973	-0.6435	0.000163295	0.0196923	0.640158
Tspan33	768.75	491.607	9.58637	8.94136	-0.645009	0.000382289	0.0371373	0.639489
Zfhx4	586.803	375.33	9.19673	8.55202	-0.644714	0.000453501	0.0435641	0.639619
Sema4g	1684.45	1076	10.7181	10.0715	-0.646598	7.39177e-05	0.0102581	0.638785
Pygm	1144.43	729.853	10.1604	9.51146	-0.648949	0.00033679	0.033652	0.637745
Rcan3	1536.03	968.557	10.585	9.91969	-0.665293	6.2892e-05	0.00910138	0.630561
Nnat	6377.93	3961.62	12.6389	11.9519	-0.686998	0.000279212	0.0294115	0.621145
Lrig1	1598.25	981.704	10.6423	9.93914	-0.703134	0.000463541	0.0440515	0.614236
Wdr6	9317.25	5697.83	13.1857	12.4762	-0.709493	1.37959e-05	0.00268039	0.611535
Zic2	1392.1	848.999	10.443	9.72962	-0.713426	0.000185422	0.0220564	0.60987
Vat1l	3911.4	2377.59	11.9335	11.2153	-0.718188	3.9023e-06	0.000947718	0.60786
1810041L15Rik	2904.24	1765.33	11.5039	10.7857	-0.718224	5.93982e-05	0.00887724	0.607845
Akap12	1263.04	766.059	10.3027	9.58131	-0.721371	3.87833e-05	0.00641131	0.606521
Ltbp3	1890.11	1143.24	10.8843	10.1589	-0.725342	7.95827e-06	0.00169705	0.604854
Ece2	2090.73	1259.08	11.0298	10.2982	-0.731639	0.000100906	0.01307	0.602219
Nrsn2	2835.71	1692.51	11.4695	10.7249	-0.744545	4.63542e-06	0.00106818	0.596856
Zfp423	977.229	576.609	9.93255	9.17145	-0.761103	3.27281e-06	0.000838893	0.590045
Rims3	5101.28	2986.8	12.3166	11.5444	-0.772259	1.76707e-05	0.00332247	0.5855
Grin2d	1499.54	864.237	10.5503	9.75528	-0.795019	0.000158784	0.0192812	0.576336
Tmem130	10149.6	5666.25	13.3091	12.4682	-0.840954	1.84782e-06	0.000516945	0.558274
Btbd11	1109.08	618.241	10.1152	9.27203	-0.843127	3.44962e-05	0.00585632	0.557434
Resp18	1488.64	816.694	10.5398	9.67365	-0.866125	4.29005e-05	0.00692701	0.548619
Itpkb	2217.14	1211	11.1145	10.242	-0.872501	2.20687e-05	0.00397827	0.546199
Megf6	493.654	268.917	8.94736	8.07102	-0.876342	5.85536e-05	0.00882645	0.544747
Zic1	4921.79	2674.69	12.265	11.3852	-0.87981	1.40515e-08	6.82512e-06	0.543439
Col27a1	494.025	267.849	8.94844	8.06527	-0.883167	0.000104023	0.013277	0.542176
Zic4	784.143	426.214	9.61497	8.73543	-0.87954	1.53489e-05	0.00294935	0.543541
Zcchc12	4547.89	2461.25	12.151	11.2652	-0.885807	1.98495e-06	0.000542326	0.541185
Hap1	12842.3	6897.28	13.6486	12.7518	-0.896801	8.06753e-07	0.000247489	0.537076
Arhgap24	366.809	196.471	8.51889	7.61818	-0.900709	6.7127e-05	0.00954295	0.535623
Fam196b	262.41	139.822	8.03568	7.12745	-0.908233	0.000355082	0.0348818	0.532837
Slc6a11	9996.53	5196.28	13.2872	12.3433	-0.943947	3.37015e-08	1.47326e-05	0.519809
Vat1	3074.33	1592.43	11.5861	10.637	-0.949048	1.07956e-07	4.10372e-05	0.517974
Prkcd	3399.65	1755.89	11.7312	10.778	-0.953179	2.51466e-08	1.18842e-05	0.516493
Htr7	451.518	232.415	8.81864	7.86056	-0.958081	9.48997e-05	0.0126673	0.514741
Ret	727.094	366.667	9.506	8.51833	-0.987673	2.35994e-05	0.00416828	0.504291
Tagap1	374.156	188.395	8.5475	7.55762	-0.989876	3.88653e-05	0.00641131	0.503521
Hddc3	227.993	113.814	7.83284	6.83053	-1.00231	0.000254183	0.027436	0.4992
2610507I01Rik	341.447	169.81	8.41552	7.40778	-1.00774	1.92708e-05	0.00358478	0.497325
Mrap2	344.039	169.025	8.42643	7.4011	-1.02533	0.000234745	0.0264823	0.491298
Tunar	824.859	403.617	9.688	8.65684	-1.03116	4.05848e-06	0.000972146	0.489316
Col18a1	405.306	197.546	8.66287	7.62605	-1.03682	7.6434e-06	0.00165003	0.4874
Col5a3	298.006	143.563	8.2192	7.16554	-1.05366	5.49615e-05	0.00850493	0.481744
Amotl1	2634.49	1235.57	11.3633	10.271	-1.09235	4.13894e-11	3.28971e-08	0.468998
Tmem255a	1365.5	640.036	10.4152	9.32201	-1.09321	2.5426e-06	0.000673636	0.468718
Ttc39a	166.731	77.8129	7.38138	6.28194	-1.09945	0.000407609	0.0393782	0.466696
Nts	421.524	194.481	8.71947	7.60349	-1.11598	0.00021043	0.0245305	0.461377
Ecel1	2104.88	959.297	11.0395	9.90583	-1.13369	8.56213e-05	0.0117888	0.455749
Zfhx3	1269.24	574.257	10.3097	9.16555	-1.14419	7.87416e-11	5.5075e-08	0.452443
Ubap1l	275.685	124.709	8.10688	6.96242	-1.14446	0.000475655	0.0449584	0.452359
Tmie	372.21	166.949	8.53997	7.38326	-1.15671	1.60794e-05	0.00305613	0.448534
Cbln4	316.479	140.294	8.30597	7.13231	-1.17366	4.68286e-06	0.00106818	0.443296
Ngb	541.627	238.312	9.08116	7.89671	-1.18445	0.000245401	0.0271587	0.439993
Npr1	281.953	123.539	8.13931	6.94882	-1.19049	1.13709e-05	0.002312	0.438154
Peg10	3277.27	1434.07	11.6783	10.4859	-1.19238	1.07357e-05	0.00220852	0.437579
Vangl1	311.195	135.283	8.28168	7.07983	-1.20184	5.19675e-06	0.00115026	0.43472
Gpr165	663.103	280.015	9.37309	8.12936	-1.24373	5.31037e-05	0.00829081	0.422281
Sparc	12901.5	5373.89	13.6552	12.3918	-1.2635	3.28455e-08	1.47266e-05	0.416534
Dlk1	1966.42	798.683	10.9414	9.64148	-1.29988	1.19578e-07	4.44883e-05	0.406161
Ndn	7935.29	3205.47	12.9541	11.6463	-1.30774	2.11908e-14	3.70542e-11	0.403952
Vav3	320.295	129.407	8.32326	7.01578	-1.30748	5.00542e-05	0.00788511	0.404025
Heyl	302.499	121.019	8.24079	6.91909	-1.3217	5.59437e-07	0.000181154	0.400064
Atp6v0c	3820.94	1508.7	11.8997	10.5591	-1.34062	6.53456e-11	4.96797e-08	0.39485
Patj	809.65	313.763	9.66115	8.29353	-1.36762	6.02706e-08	2.38077e-05	0.387529
Ntng1	1488.96	578.419	10.5401	9.17597	-1.36412	3.31028e-06	0.000838893	0.388472
Itih3	2480.87	948.488	11.2766	9.88949	-1.38714	8.91697e-07	0.000268831	0.382321
Hcn4	452.454	171.814	8.82163	7.4247	-1.39693	1.52969e-06	0.000438494	0.379737
A2m	205.672	77.4648	7.6842	6.27547	-1.40873	0.000530493	0.0483136	0.376643
Cbln1	764.868	280.437	9.57907	8.13153	-1.44754	3.65266e-08	1.55781e-05	0.366647
Nr2f2	560.029	204.49	9.12936	7.67589	-1.45347	5.44907e-10	3.40294e-07	0.365142
Gck	215.937	77.835	7.75447	6.28235	-1.47212	0.000195187	0.0230611	0.360452
Etnppl	1147.71	404.966	10.1645	8.66166	-1.50289	8.74271e-06	0.00181994	0.352847
Gpr139	127.497	44.6222	6.99432	5.47969	-1.51463	0.000209137	0.0245305	0.349987
Gpr101	659.844	228.341	9.36598	7.83505	-1.53093	4.29334e-07	0.000141648	0.346053
Gm43398	310.62	105.948	8.27901	6.72722	-1.55179	1.86249e-06	0.000516945	0.341086
AW551984	1025.24	337.465	10.0017	8.39859	-1.60315	3.72307e-06	0.000916924	0.329156
Grid2ip	714.569	232.843	9.48093	7.86321	-1.61772	1.76172e-12	1.92534e-09	0.32585
Arhgap36	465.026	151.269	8.86117	7.24097	-1.6202	6.92103e-07	0.000220038	0.32529
Mrvi1	229.07	73.6153	7.83965	6.20193	-1.63771	0.000100802	0.01307	0.321366
Dgkk	439.71	141.269	8.78041	7.1423	-1.63811	0.000239319	0.0266543	0.321276
Gm13112	95.6244	30.6996	6.57931	4.94015	-1.63916	0.000247062	0.0271707	0.321044
Prlr	367.3	117.156	8.52081	6.87228	-1.64853	6.70582e-05	0.00954295	0.318965
Calb2	2170.26	679.486	11.0837	9.4083	-1.67535	2.44875e-22	1.4273e-18	0.31309
Kcng4	457.336	138.609	8.83711	7.11488	-1.72223	1.86611e-13	2.71923e-10	0.30308
Baiap3	5027.62	1497.33	12.2957	10.5482	-1.74748	6.95171e-12	6.07788e-09	0.297821
Syt9	791.819	226.959	9.62903	7.82629	-1.80274	3.70249e-07	0.000124503	0.28663
Slc17a6	1891.35	539.229	10.8852	9.07476	-1.81045	3.8986e-13	4.86935e-10	0.285103
BC035947	153.868	41.7321	7.26555	5.38309	-1.88246	0.00023704	0.0265698	0.27122
Gabrq	496.496	132.647	8.95564	7.05145	-1.90418	4.85166e-06	0.00108764	0.267167
Rab37	184.179	47.6652	7.52496	5.57486	-1.9501	0.00021289	0.0246529	0.258798
Slitrk6	150.957	39.117	7.23799	5.28972	-1.94827	0.000328262	0.033372	0.259127
Greb1	120.475	29.8353	6.91259	4.89895	-2.01364	4.34115e-06	0.0010258	0.247647
Trpm6	68.632	16.7261	6.10081	4.06403	-2.03678	0.0002662	0.0283828	0.243707
Lhx9	369.43	84.7054	8.52916	6.40438	-2.12478	5.39627e-12	5.24217e-09	0.229287
Sfrp5	175.841	40.2428	7.45813	5.33066	-2.12746	7.66995e-07	0.000239494	0.22886
Xlr3a	61.7968	13.8428	5.94946	3.79106	-2.1584	0.000119412	0.0149146	0.224005
Chrna3	204.421	45.799	7.6754	5.51724	-2.15816	5.35512e-06	0.0011705	0.224042
Calcr	174.561	38.667	7.44758	5.27303	-2.17455	1.26747e-05	0.00251852	0.221511
Gpr179	103.181	22.4419	6.68904	4.48812	-2.20092	3.28456e-06	0.000838893	0.217499
Glra1	71.2779	14.6273	6.15538	3.87059	-2.28479	0.000183449	0.0219711	0.205215
Irx1	96.9118	18.5125	6.5986	4.21043	-2.38817	5.69692e-05	0.00873827	0.191024
Epn3	208.704	39.8727	7.70532	5.31733	-2.38799	6.12688e-08	2.38077e-05	0.191049
Gm5741	82.178	15.259	6.36068	3.93159	-2.4291	0.000221196	0.0254462	0.185682
Nhlh2	100.822	18.7451	6.65567	4.22844	-2.42723	2.23971e-07	7.67913e-05	0.185922
Agt	1337.47	246.949	10.3853	7.94807	-2.43722	1.09517e-14	2.39377e-11	0.184639
Frem3	196.835	35.9144	7.62084	5.16649	-2.45435	5.52867e-09	3.11853e-06	0.18246
Tcf7l2	1009.68	181.554	9.97969	7.50425	-2.47543	0.000112274	0.0141239	0.179813
Tac2	374.831	65.6767	8.5501	6.03731	-2.51279	7.31773e-21	3.19895e-17	0.175217
Irs4	798.22	135.69	9.64064	7.08417	-2.55647	1.68804e-11	1.40557e-08	0.169991
Lhx5	73.8773	12.6881	6.20706	3.6654	-2.54166	4.31799e-05	0.00692701	0.171745
Catsperg2	105.974	14.9686	6.72757	3.90387	-2.8237	1.87411e-07	6.55413e-05	0.141247
Xlr3b	187.439	24.8531	7.55028	4.63536	-2.91492	2.00598e-14	3.70542e-11	0.132593
Gpr151	168.476	18.7451	7.3964	4.22844	-3.16795	5.38103e-08	2.1882e-05	0.111263
Rnaset2b	110.947	12.1651	6.79372	3.60467	-3.18905	1.3388e-07	4.87715e-05	0.109648
Xlr4b	35.7746	3.95823	5.16087	1.98486	-3.17601	0.000289145	0.0301131	0.110643
Trh	371.155	38.6449	8.53588	5.27221	-3.26367	1.12541e-18	3.27983e-15	0.104121
D130058E05Rik	58.6776	5.16387	5.87474	2.36845	-3.50628	4.3638e-05	0.00693686	0.0880042
B230323A14Rik	32.6481	2.41128	5.02893	1.2698	-3.75913	0.000513306	0.0472403	0.0738567
Gbx2	120.404	6.92138	6.91174	2.79106	-4.12068	1.16055e-08	5.79811e-06	0.0574846
Gal	218.699	12.6083	7.7728	3.6563	-4.1165	2.22247e-13	2.98939e-10	0.0576512
Hmx3	39.2429	1.67771	5.29436	0.74649	-4.54787	2.29552e-05	0.00409586	0.0427518
Foxb1	28.9084	1.20564	4.85342	0.269799	-4.58362	0.000290953	0.0301131	0.0417055
Irx2	94.1653	3.22466	6.55712	1.68915	-4.86798	1.2648e-10	8.19125e-08	0.0342447
Otp	100.319	2.49108	6.64845	1.31677	-5.33167	2.60181e-09	1.5688e-06	0.0248317
Chrnb4	147.815	3.82748	7.20765	1.93639	-5.27125	5.06344e-12	5.20819e-09	0.0258937
